# Supplementary material
Source: Springer Nature journal article supplement (https://www.springermedizin.de/resource/supplementary/12985_2009_678_MOESM5_ESM.pdf/9608252)

|0.1

|0.2

|0.3 |0.3172

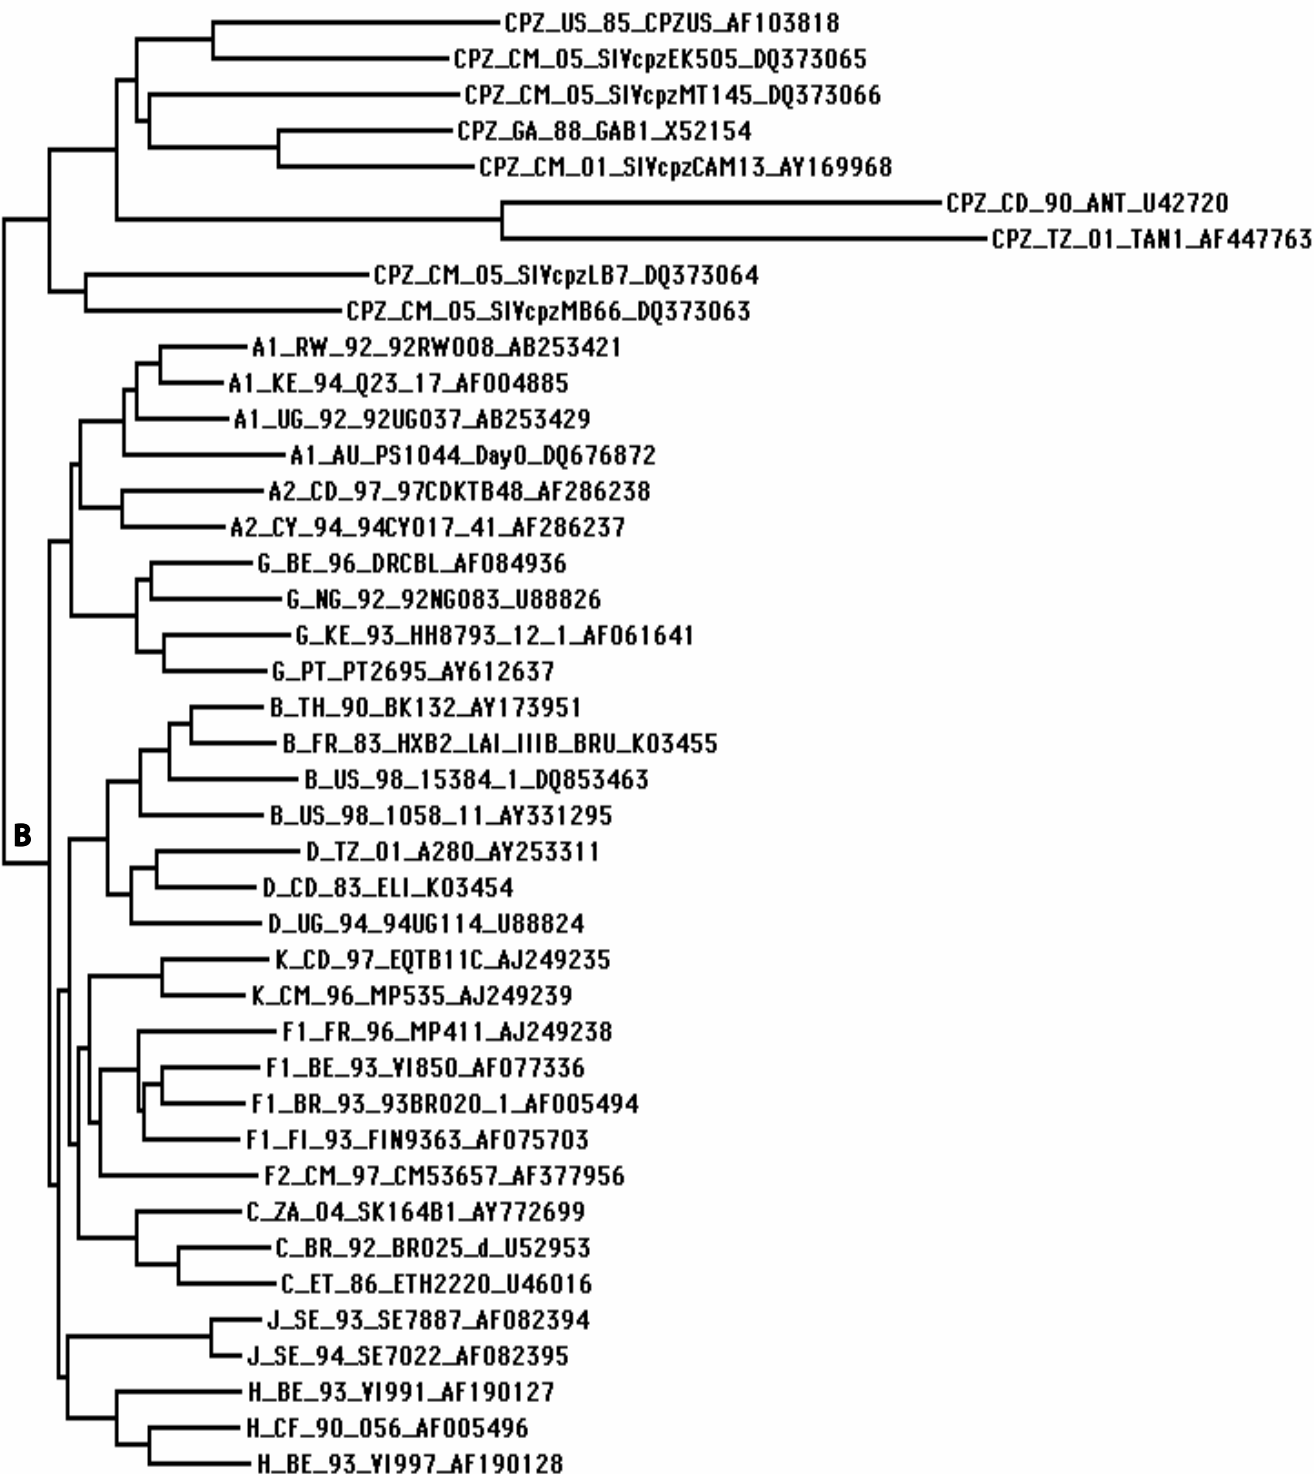

Supplement: MOESM5 [file 9608252]
